# Supplementary material
Source: PubMed Central journal article supplement (PMC3060257)
Supplement: 1015078108_sapp.pdf [file 1015078108_sapp.pdf]

## Supporting Online Information for

### **Climate change risks for African agriculture**

Christoph Müller\*, Wolfgang Cramer, William L. Hare, Hermann Lotze-Campen

\*Author for correspondence. E-mail: christoph.mueller@pik-potsdam.de

Published in PNAS

DOI: 10.1073/pnas.1015078108

#### **This PDF file includes**

- Table S1: ‘Line of sight’ from the key statement about African food security in the IPCC Synthesis Report (SYR) to underlying chapters and summaries
- Table S2: Recent studies about quantitative climate change impacts on African agriculture (published after IPCC AR4 WGII literature cut-off deadline, April 21, 2006)
- Table S3: Recent qualitative impact assessments of climate change on African agriculture (published after IPCC AR4 WGII literature cut-off deadline, April 21, 2006)
- Text S1: Source of uncertainty in recent assessments of climate change risks for African agriculture
- Text S2: Additional explanations to the figure in the main text
- References

**Table S1: ‘Line of sight’ from the key statement about African food security in the IPCC Synthesis Report (SYR) to underlying chapters and summaries**

|              |                                                                                                                                                                                                                                                              |                                                                                                                                                                                                                                                                                                                                                                                                                                                                                                                                                                                                                                                                                                                                                                                                                                                                                                                                     |                                                                                                                                                                                                                                                                                                                                      |
|--------------|--------------------------------------------------------------------------------------------------------------------------------------------------------------------------------------------------------------------------------------------------------------|-------------------------------------------------------------------------------------------------------------------------------------------------------------------------------------------------------------------------------------------------------------------------------------------------------------------------------------------------------------------------------------------------------------------------------------------------------------------------------------------------------------------------------------------------------------------------------------------------------------------------------------------------------------------------------------------------------------------------------------------------------------------------------------------------------------------------------------------------------------------------------------------------------------------------------------|--------------------------------------------------------------------------------------------------------------------------------------------------------------------------------------------------------------------------------------------------------------------------------------------------------------------------------------|
| SYR          |                                                                                                                                                                                                                                                              | “By 2020, in some countries, yields from rain-fed agriculture could be reduced by up to 50%.”, preceding the main point in the associated paragraph: <b>“Agricultural production, including access to food, in many African countries is projected to be severely compromised. This would further adversely affect food security and exacerbate malnutrition.”</b>                                                                                                                                                                                                                                                                                                                                                                                                                                                                                                                                                                  |                                                                                                                                                                                                                                                                                                                                      |
| based on     | referring to                                                                                                                                                                                                                                                 | WGII SPM <b>“In some countries, yields from rain-fed agriculture could be reduced by up to 50% by 2020”</b> , at the end of a paragraph on food security in Africa: <b>“Agricultural production, including access to food, in many African countries and regions is projected to be severely compromised by climate variability and change. The area suitable for agriculture, the length of growing seasons and yield potential, particularly along the margins of semi-arid and arid areas, are expected to decrease. This would further adversely affect food security and exacerbate malnutrition in the continent. In some countries, yields from rain-fed agriculture could be reduced by up to 50% by 2020”</b> . The WGII SPM conclusion is linked to sections 9.2, 9.4 and 9.6 which integrate present sensitivity, projected effects and interactions with non climate stressors to provide the basis for the conclusion. |                                                                                                                                                                                                                                                                                                                                      |
|              |                                                                                                                                                                                                                                                              | WG II 9.4.4 <b>“In other countries, additional risks that could be exacerbated by climate change include greater erosion, deficiencies in yields from rain-fed agriculture of up to 50% during the 2000-2020 period, and reductions in crop growth period (Agoumi, 2003).”</b> (1, page 448). The paragraph in which this text occurs describes a range of risks additional to those discussed in preceding paragraphs, including declines in net crop revenue and loss of national agricultural production in Egypt. In each case the <b>“deficiencies in yields form rain-fed agriculture of up to 50% during the 2000-2020 period”</b> , are described as a climate change impact in Agoumi 2003 (2, page 5)                                                                                                                                                                                                                     |                                                                                                                                                                                                                                                                                                                                      |
|              |                                                                                                                                                                                                                                                              | Agoumi 2003 <b>“Studies on the future of vital agriculture in the region have shown the following risks, which are linked to climate change: [...] deficient yields from rain-based agriculture of up to 50 per cent during the 2000–2020 period”</b> , which in turn is based on <i>Initial National Communications to the UNFCCC</i> by three countries (Algeria, Morocco, and Tunisia) <sup>1</sup> :                                                                                                                                                                                                                                                                                                                                                                                                                                                                                                                            |                                                                                                                                                                                                                                                                                                                                      |
|              |                                                                                                                                                                                                                                                              | referring to                                                                                                                                                                                                                                                                                                                                                                                                                                                                                                                                                                                                                                                                                                                                                                                                                                                                                                                        | Morocco 2001 Morocco projects cereal production to experience up to 50% reductions due to climate change: <b>“The study of CC impacts on agriculture (dominated by cereal cultivation) in 2020 unfolds the following results: A decrease in cereal yields by 50% in dry years and 10% in normal years.”</b> (3, page 11)             |
|              |                                                                                                                                                                                                                                                              | referring to                                                                                                                                                                                                                                                                                                                                                                                                                                                                                                                                                                                                                                                                                                                                                                                                                                                                                                                        | Tunisia 2001 Tunisia does not assess any impact on agriculture: <b>“As for the vulnerability, apart from the impact of Sea Level Rise, no study has been conducted, to this date, on the vulnerability of forests and continental agriculture to Climate Change, and on the identification of adaptation measures.”</b> (4, page 25) |
| referring to | Algeria 2001 Algeria applies assumptions on technological and management improvements that lead to considerable yield increases in 2020. Climate change impacts are projected to <b>reduce cereal yields by 0.1 to 13.9% in 2020</b> (5, page 95, table 47). |                                                                                                                                                                                                                                                                                                                                                                                                                                                                                                                                                                                                                                                                                                                                                                                                                                                                                                                                     |                                                                                                                                                                                                                                                                                                                                      |

<sup>1</sup> Initial National Communications to the UNFCCC from Algeria, Morocco, and Tunisia, presented at COP-7 in October 2001. These communications are available at the Web site of the United Nations Framework Convention on Climate Change (UNFCCC).

**Table S2: Recent studies about quantitative climate change impacts on African agriculture (published after IPCC AR4 WGII literature cut-off deadline, April 21, 2006)**

| Reference                     | Method                        | Reference area                   | Time horizon                           | Resolution                                                    | Max damage [%] | Min damage / max benefit [%] |
|-------------------------------|-------------------------------|----------------------------------|----------------------------------------|---------------------------------------------------------------|----------------|------------------------------|
| Cline 2007 (6)                | Ricardian                     | Africa                           | 2080s                                  | countries                                                     | -100           | 64                           |
| Benhin 2008 (7) <sup>2</sup>  | Ricardian                     | South Africa                     | 2050                                   | -/-                                                           | -27.74         | -1.15                        |
|                               |                               |                                  | 2100                                   |                                                               | -89.39         | -8.82                        |
| Liu et al. 2008 (8)           | process-based model (GEPIC)   | SSA                              | 2030s                                  | grid (30' lon / lat)                                          | <-50           | >+50                         |
| Liu et al. 2008 (8)           | process-based model (GEPIC)   | SSA                              | 2030s                                  | countries                                                     | <-20           | >+20                         |
| Lobell et al. 2008 (9)        | statistics                    | SSA                              | 2030s                                  | sub-regions                                                   | -40            | +30                          |
| Paeth et al. 2008 (10)        | statistics                    | Benin                            | 2020s                                  | Benin                                                         | -17            | -9.1                         |
| Seo et Mendelsohn 2008 (11)   | econometric, livestock sector | Africa                           | 2020 / 2050 / 2100                     | -/-                                                           | -25            | +168                         |
| Walker & Schulze 2008 (12)    | process-based model (CERES)   | South Africa                     | stylized scenarios (2070-2100)         | catchments                                                    | -28            | +33.8                        |
| Müller et al. 2009 (13)       | process-based model (LPJmL)   | SSA & North Africa/Middle East   |                                        | regions                                                       | -12.9          | +17.3                        |
| Nelson et al. 2009 (14)       | process-based model (DSSAT)   | SSA & North Africa / Middle East |                                        | regions                                                       | -84.2          | +61.8                        |
| Seo et al. 2009 (15)          | Ricardian                     | Africa                           | 2100                                   | Agro-Ecological Zones                                         | -62            | +135                         |
| Thornton et al. 2009 (16)     | process-based model (DSSAT)   | East Africa                      | 2050                                   | sub-regions                                                   | -15            | -1                           |
| Thornton et al. 2009 (16)     | process-based model (DSSAT)   | East Africa                      | 2050                                   | grid (10' lon/lat)                                            | <-20           | >+20                         |
| Thornton et al. 2010 (17)     | process-based model (DSSAT)   |                                  | 2050                                   | random selection of highly impacted grid pixels (10' lon/lat) | -65            | -35                          |
| Schlenker et Lobell 2010 (18) | statistics                    | SSA                              | 2046-2065                              | -/-                                                           | -37            | 12                           |
| Schlenker et Lobell 2010 (18) | statistics                    | SSA                              | 2046-2065                              | Maize in SSA countries                                        | -57            | -7                           |
| Tan et al. 2010 (19)          | process-based                 | Bawku savanna zone in NE Ghana,  | Time series but only 2100 is discussed | -/-                                                           | -41            | 52                           |

<sup>2</sup> Already assessed in the AR4 WGII report as ref. (7)

**Table S3: Recent qualitative impact assessments of climate change on African agriculture (published after IPCC AR4 WGII literature cut-off deadline, April 21, 2006)**

| Reference                     | Method                                               | Reference area            | Time horizon             | Statement                                                                                                                                                                                                                                                                                                                                                                                                                                                                                                                                                                                                                                                                                                                                                                                                                  |
|-------------------------------|------------------------------------------------------|---------------------------|--------------------------|----------------------------------------------------------------------------------------------------------------------------------------------------------------------------------------------------------------------------------------------------------------------------------------------------------------------------------------------------------------------------------------------------------------------------------------------------------------------------------------------------------------------------------------------------------------------------------------------------------------------------------------------------------------------------------------------------------------------------------------------------------------------------------------------------------------------------|
| Burke et al. 2009 (20)        | analysis of GCM projections                          | Africa                    | 2025 / 2050 / 2075       | <p>“If breeding efforts cannot sustain yield for maize for these hottest climates in the face of warming temperatures, switches to potentially more heat-and drought tolerant crops, such as sorghum and millet, could be necessary.”</p> <p>“With maize, for example, 28% of the population of Africa lives in countries where less than half of the area will have an analog in the current climate of locations in their own country.”</p>                                                                                                                                                                                                                                                                                                                                                                              |
| Funk et al. 2008 (21)         | empirical relationships, analysis of GCM projections | Eastern & Southern Africa | 21 <sup>st</sup> century | <p>“These anthropogenic drought tendencies may be indicative of other ‘Indian Rim’ and South American countries as well, because similar precipitation reformulations also suggest 21<sup>st</sup> century main season declines (40), with the result that main growing season droughts may disproportionately affect tropical and subtropical countries. Global assessments of anthropogenic precipitation (13) and yield (18) changes may be underestimating these drought signals.”</p>                                                                                                                                                                                                                                                                                                                                 |
| Jones and Thornton 2009 (22)  | analysis of GCM projections                          | Africa                    | 2050                     | <p>“Under even a moderate GHG-emission scenario for the coming decades, there are likely to be substantial shifts in the patterns of African cropping and livestock keeping to the middle of the century.”</p> <p>“Climate change impacts in some of the marginal cropping lands of Africa are likely to be severe, and poverty rates in these areas are already high. Results of this analysis suggest further that the poor in the more remote transition zones are likely to be disproportionately affected.”</p>                                                                                                                                                                                                                                                                                                       |
| Li et al. 2009 (23)           | drought risk assessment, analysis of GCM projections | global                    | 2050 / 2100              | <p>“Among the regions, Africa is ranked as the highest, with a baseline drought risk index value of 95.77 which increases to 205.46 in 2100 projections. Correspondingly, the rates of yield reduction related to drought disaster for major crops will increase significantly with future climate change, by &gt;50% in 2050 and almost 90% in 2100 for the major crops.”</p>                                                                                                                                                                                                                                                                                                                                                                                                                                             |
| Battisti and Naylor 2009 (24) | historical analogues, analysis of GCM projections    | global                    | 2050                     | <p>“If growing season temperatures by the end of the 21<sup>st</sup> century remain chronically high and greatly exceed the hottest temperature on record throughout much of the world, not just for these three examples, then global food security will be severely jeopardized unless large adaptation investments are made. Climate model projections from the IPCC 2007 assessment suggest that this outcome is indeed very likely (Fig. 3). Figure 3A shows that, as early as 2050, the median projected summer temperature is expected to be higher than any year on record in most tropical areas. By the end of the century, it is very likely (greater than 90% chance) that a large proportion of tropical and subtropical Asia and Africa will experience unprecedented seasonal average temperature [..]”</p> |
| Blignaut et al. 2009 (25)     | statistical analysis                                 | South Africa              | historic                 | <p>“A 1% decline in rainfall is likely to lead to a decline in maize production of 1.16% and a decline in wheat production of 0.5%. Such a decline in rainfall is also likely to lead to a decline in net income in the most productive provinces.”</p>                                                                                                                                                                                                                                                                                                                                                                                                                                                                                                                                                                    |

## **Text S1: Sources of uncertainty in recent assessments of climate change risks for African agriculture**

The published impact assessments employ various methods, input data, and assumptions to project climate change impacts. For a better understanding of the different levels of uncertainty, we give a short overview of the different sources of uncertainty, comprising the level of aggregation, input data used (i.e. climate projections), other system dynamics considered (e.g., CO<sub>2</sub> fertilization, adaptation).

The first level of uncertainty in climate change impact assessments is inherent in the range of climate change projections, which are used as input for climate change impact assessments. Projections of climate change as provided by climate models are driven by emission scenarios. Emission scenarios are plausible future projections of energy demand and supply. These may include assumptions about technological progress (26) as well as other socio-economic factors, which are all inherently uncertain. Guided by the IPCC process, a broad range of possible emission scenarios has been implemented by a number of climate models, which also differ significantly in their projected patterns and magnitude of changing temperature and rainfall (27, 28). Nearly always, only a small selection of available climate change projections is used in impact assessments, and only occasionally the uncertainty inherent in different climate change projections is addressed explicitly (13). Most of the time, between two and five climate realizations are analyzed in parallel, or stylized scenarios are being employed (12). Climate scenarios are usually computed and provided at much coarser scales than typical operational scales of crop models. Most model applications need to downscale climate projections, adding a new dimension of uncertainty (e.g. 29). Consequently, most projections of climate change impacts on African agriculture exclude important aspects of climate change such as e.g. changes in short-term weather variability.

Impact models used to assess the effects of climate change on African agriculture employ a variety of methods that differ in their suitability for climate change impact projections. Statistical methods, both used in bio-physical as well as econometric analyses are generally

unsuitable for extrapolation to novel conditions. Climate change is projected to move weather patterns out of the range of observed variability (20), limiting the applicability of statistical methods. Econometric models are strongly limited by data availability, as they derive statistical relationships between farmers' incomes, production systems and environmental conditions (15). Statistical models that describe agricultural productivity as a function of weather conditions often have little explanatory power (9). Process-based models are often limited by the lack of site-specific parameterization of management options and varieties (13, 14) and the risk of over-tuning (30).

The level of aggregation is another reason for differences in reported impact ranges. For specific locations and crops, impacts are reported to range between severe damages and significant increases: Some regions in Africa are likely to undergo changes to more severe conditions (drier, hotter) (21), while others may experience improved cropping conditions (wetter, warmer in temperature-limited highlands). Crops also respond differently depending on their sensitivity to changing heat, water stress, and possible CO<sub>2</sub> fertilization. Wheat, for example, has a low temperature optimum and is projected to experience strong yield reductions in Africa, while millet, with its higher temperature optimum, is projected to mainly benefit from climate change (8, 14). The complexity of different cropping systems, crop types, and crop varieties is often poorly represented in impact models, although there are attempts to link crop variety parameters to environmental conditions, assuming an adaptation of crop varieties to climate change (31). Due to the heterogeneous spatial patterns of climate change and the complexity of cropping systems, reported climate change impacts tend to be more moderate if reported at higher aggregation levels, as positive and negative responses to climate change may cancel out. This has been demonstrated by e.g. Liu et al. 2008 (8) and Thornton et al. 2010 (17), who provide results at grid cell level as well as national summaries.

Uncertainties from climate forcings and impact models are compounded by system dynamics other than climate change and the assumptions that are being made about them. One of the most crucial aspects is the direct impact of enhanced atmospheric CO<sub>2</sub> on plant

growth, which should principally be capable of increasing crop yields considerably due to two processes: i) enhanced carbon assimilation rates, and ii) improved water-use efficiency (32). There is some experimental evidence for “CO<sub>2</sub> fertilization” in various crops such as wheat and cotton (33), but the validity of these findings for larger regions and entire cropping systems is uncertain. First of all, increased carbon assimilation rates can only be converted into productive plant tissue or the only economically relevant part, the harvested storage organs, if sufficient nutrients are available to sustain the additional growth. Where growth is already constrained by nutrient limitations, additional growth will be very limited (33). On top of that, there are indications that key factors of quality of agricultural products may decrease under increased CO<sub>2</sub>, e.g., by reduced protein content (34). Some crops grown under elevated CO<sub>2</sub> have been found to be more susceptible to insects and pests (35, 36) or display reduced ability to assimilate nitrogen (37).

Other examples of non-climatic drivers of change include the development of management schemes, technological progress, land-use change, or soil degradation. For some of these non-climatic drivers of change, adaptation may be assumed to occur easily (e.g., by adjustment of cropping periods with changing climate), others are unlikely to happen without major adaptation efforts (24). For a more detailed discussion of non-climatic drivers of changes in agricultural productivity see Chalinor et al. 2007 (30).

**Text S2: Additional explanations to the figure in the main text**

The reference Ben08 (7) had already been assessed for the AR4 WGII report as (38); Seo08 refer to the livestock sector only; Tho10 report pixel-based results only for a random selection of strongly impacted pixels; Sch10 show country data only for maize; Wal08 employ stylized scenarios that are representative for the climate in 2070-2100; Tan10 refer to NE Ghana only.



## References

1. Boko M, *et al.* (2007) Africa. *Climate Change 2007: Impacts, Adaptation and Vulnerability. Contribution of Working Group II to the Fourth Assessment Report of the Intergovernmental Panel on Climate Change*, eds Parry ML, Canziani OF, Palutikof JP, van der Linden PJ, & Hanson CE (Cambridge University Press, Cambridge, UK), pp 433-467.
2. Agoumi A (2003) Vulnerability of North African countries to climatic changes: adaptation and implementation strategies for climatic change. in *Developing Perspectives on Climate Change: Issues and Analysis from Developing Countries and Countries with Economies in Transition* (International Institute for Sustainable Development & Climate Change Knowledge Network, Winnipeg, Manitoba, Canada), p 14.
3. Kingdom of Morocco, Ministère de l'Aménagement du Territoire, de l'Urbanisme, de l'Habitat et de l'Environnement (2001) First National Communication United Nations Framework Convention on Climate Change, Executive summary.
4. Republic of Tunisia Ministry of Environment and Land Planning (2001) Initial Communication of Tunisia under the United Nations Framework Convention on Climate Change October 2001 SUMMARY VERSION.
5. République Algérienne Démocratique et Populaire, Ministère de l'Aménagement du Territoire et de l'Environnement, Direction Générale de l'Environnement (2001) Elaboration de la stratégie et du plan d'action national des changements climatiques Communication Nationale Initiale.
6. Cline WR (2007) *Global Warming and Agriculture. Impact Estimates by Country* (Center for Global Development and Peterson Institute for International Economics, Washington, DC).
7. Benhin JKA (2008) South African crop farming and climate change: An economic assessment of impacts. *Global Environmental Change-Human and Policy Dimensions* 18(4):666-678.
8. Liu JG, *et al.* (2008) A spatially explicit assessment of current and future hotspots of hunger in Sub-Saharan Africa in the context of global change. *Global and Planetary Change* 64(3-4):222-235.
9. Lobell DB, *et al.* (2008) Prioritizing Climate Change Adaptation Needs for Food Security in 2030. *Science* 319(5863):607-610.
10. Paeth H, Capo-Chichi A, & Endlicher W (2008) Climate change and food security in tropical West Africa - A dynamic-statistical modelling approach. *Erdkunde* 62(2):101-115.
11. Seo SN & Mendelsohn R (2008) Measuring impacts and adaptations to climate change: a structural Ricardian model of African livestock management. *Agric. Econ.* 38(2):151-165.
12. Walker NJ & Schulze RE (2008) Climate change impacts on agro-ecosystem sustainability across three climate regions in the maize belt of South Africa. *Agriculture Ecosystems & Environment* 124(1-2):114-124.

13. Müller C, Bondeau A, Popp A, Waha K, & Fader M (2009) Climate change impacts on agricultural yields. (The World Bank, Washington, DC).
14. Nelson GC, *et al.* (2009) Climate Change - Impact on Agriculture and Costs of Adaptation. in *Food Policy Report* (International Food Policy Research Institute, Washington D.C.), p 30.
15. Seo SN, Mendelsohn R, Dinar A, Hassan R, & Kurukulasuriya P (2009) A Ricardian Analysis of the Distribution of Climate Change Impacts on Agriculture across Agro-Ecological Zones in Africa. *Environmental & Resource Economics* 43(3):313-332.
16. Thornton PK, Jones PG, Alagarswamy G, & Andresen J (2009) Spatial variation of crop yield response to climate change in East Africa. *Global Environmental Change-Human and Policy Dimensions* 19(1):54-65.
17. Thornton PK, Jones PG, Alagarswamy G, Andresen J, & Herrero M (2010) Adapting to climate change: Agricultural system and household impacts in East Africa. *Agricultural Systems* 103(2):73-82.
18. Schlenker W & Lobell DB (2010) Robust negative impacts of climate change on African agriculture. *Environmental Research Letters* 5(1):014010.
19. Tan ZX, Tieszen LL, Liu SG, & Tachie-Obeng E (2010) Modeling to evaluate the response of savanna-derived cropland to warming-drying stress and nitrogen fertilizers. *Climatic Change* 100(3-4):703-715.
20. Burke MB, Lobell DB, & Guarino L (2009) Shifts in African crop climates by 2050, and the implications for crop improvement and genetic resources conservation. *Global Environmental Change-Human and Policy Dimensions* 19(3):317-325.
21. Funk C, *et al.* (2008) Warming of the Indian Ocean threatens eastern and southern African food security but could be mitigated by agricultural development. *Proceedings of the National Academy of Sciences* 105(32):-.
22. Jones PG & Thornton PK (2009) Croppers to livestock keepers: livelihood transitions to 2050 in Africa due to climate change. *Environmental Science & Policy* 12(4):427-437.
23. Li YP, Ye W, Wang M, & Yan XD (2009) Climate change and drought: a risk assessment of crop-yield impacts. *Climate Research* 39(1):31-46.
24. Battisti DS & Naylor RL (2009) Historical Warnings of Future Food Insecurity with Unprecedented Seasonal Heat. *Science* 323(5911):240-244.
25. Blignaut J, Ueckermann L, & Aronson J (2009) Agriculture production's sensitivity to changes in climate in South Africa. *South African Journal of Science* 105(1-2):61-68.
26. Edenhofer O, Bauer N, & Kriegler E (2005) The impact of technological change on climate protection and welfare: Insights from the model MIND. *Ecological Economics* 54(2-3):277-292.
27. Gleckler PJ, Taylor KE, & Doutriaux C (2008) Performance metrics for climate models. *Journal of Geophysical Research-Atmospheres* 113(D6):D06104.
28. Solomon S, *et al.* (2007) *Climate Change 2007: The Physical Science Basis. Contribution of Working Group I to the Fourth Assessment Report of the Intergovernmental Panel on Climate Change* (Cambridge University Press, Cambridge, United Kingdom and New York, NY, USA).

29. Giorgi F (2006) Regional climate modeling: Status and perspectives. *Journal De Physique Iv* 139:101-118.
30. Challinor A, Wheeler T, Garforth C, Craufurd P, & Kassam A (2007) Assessing the vulnerability of food crop systems in Africa to climate change. *Climatic Change* 83(3):381-399.
31. Bondeau A, *et al.* (2007) Modelling the role of agriculture for the 20th century global terrestrial carbon balance. *Global Change Biology* 13(3):679-706.
32. Tubiello FN, *et al.* (2007) Crop response to elevated CO<sub>2</sub> and world food supply - A comment on "Food for Thought..." by Long *et al.*, Science 312 : 1918-1921, 2006. *European Journal of Agronomy* 26(3):215-223.
33. Ainsworth EA & Long SP (2005) What have we learned from 15 years of free-air CO<sub>2</sub> enrichment (FACE)? A meta-analytic review of the responses of photosynthesis, canopy. *New Phytologist* 165(2):351-371.
34. Taub DR, Miller B, & Allen H (2008) Effects of elevated CO<sub>2</sub> on the protein concentration of food crops: a meta-analysis. (Translated from English) *Global Change Biology* 14(3):565-575 (in English).
35. Dermody O, O'Neill BF, Zangerl AR, Berenbaum MR, & DeLucia EH (2008) Effects of elevated CO<sub>2</sub> and O<sub>3</sub> on leaf damage and insect abundance in a soybean agroecosystem. (Translated from English) *Arthropod-Plant Interact.* 2(3):125-135 (in English).
36. Zavala JA, Casteel CL, DeLucia EH, & Berenbaum MR (2008) Anthropogenic increase in carbon dioxide compromises plant defense against invasive insects. (Translated from English) *Proceedings of the National Academy of Sciences of the United States of America* 105(13):5129-5133 (in English).
37. Bloom AJ, Burger M, Asensio JSR, & Cousins AB (2010) Carbon Dioxide Enrichment Inhibits Nitrate Assimilation in Wheat and Arabidopsis. 328(5980):899-903.
38. Benhin JKA (2006) Climate change and South African agriculture: impacts and adaptation options. in *Special Series on Climate Change and Agriculture in Africa* (Centre for Environmental Economics and Policy in Africa, University of Pretoria, Pretoria), p 78.
